# Supplementary material for: Genetic Variability and Molecular Evolution of Tomato Mosaic Virus Populations in Three Northern China Provinces
Source: MDPI journal article supplement (doi:10.3390/v15071617), 2023-07-24
Supplement: s1 [file s1]

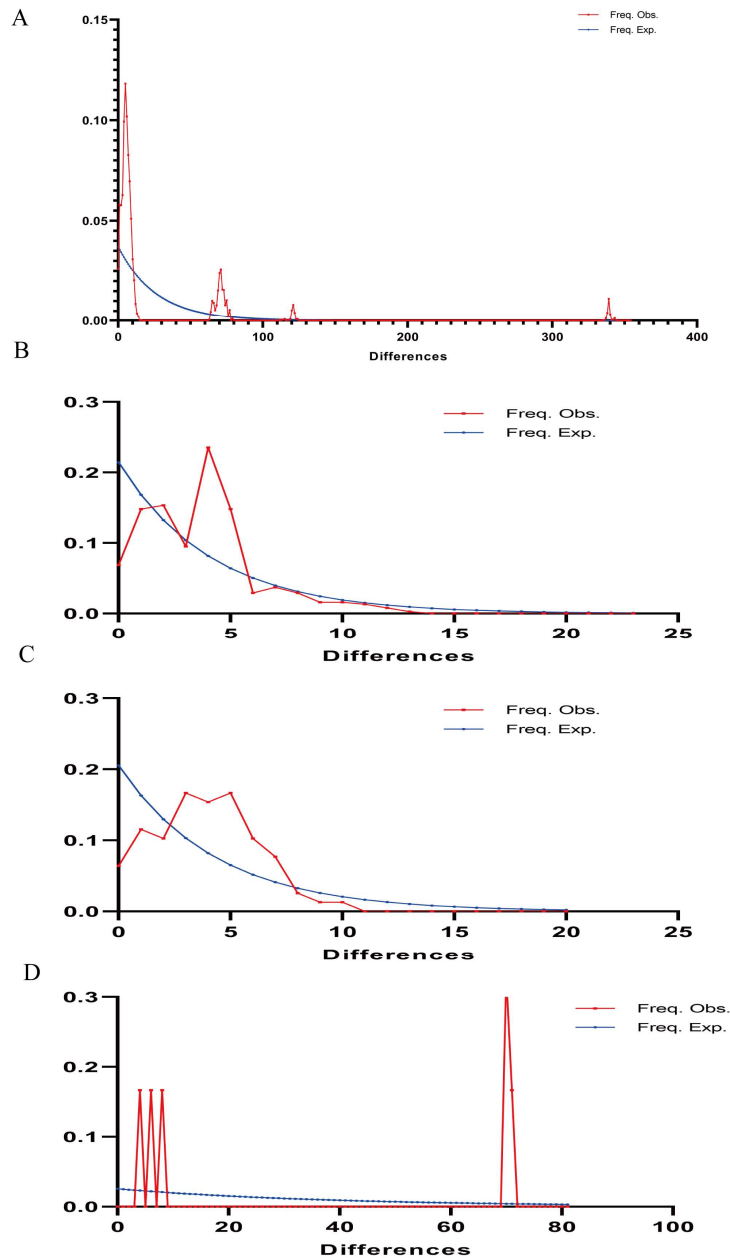

**Figure S1.** Nucleotide sequence mismatch distribution of ToMV isolates from different regions A (Asia), B (Europe), C (Africa) and D (America).

**Table S1.** Information for tomato mosaic virus (ToMV) isolates used in this study.

|          | GenBank acc. No. | Isolate   | Genome                | Host                    | Origin |
|----------|------------------|-----------|-----------------------|-------------------------|--------|
| Asia (A) | KY949475         | GS102     | CP/complete sequence  | Tomato                  | China  |
|          | KY949480         | Neimenggu | CP/ complete sequence | Solanum lycopersicum    | China  |
|          | KY949481         | LC        | CP/ complete sequence | Solanum lycopersicum    | China  |
|          | KY967219         | SX        | CP/ complete sequence | Lycopersicon esculentum | China  |
|          | KY967220         | SGHG      | CP/ complete sequence | Lycopersicon esculentum | China  |
|          | KY967221         | SGZZ      | CP/ complete sequence | Lycopersicon esculentum | China  |
|          | KY967222         | Tai'an    | CP/complete sequence  | Lycopersicon esculentum | China  |
|          | KY967223         | ZB        | CP/ complete sequence | Lycopersicon esculentum | China  |
|          | KY967224         | JN        | CP/ complete sequence | Lycopersicon esculentum | China  |
|          | KY967225         | LY        | CP/ complete sequence | Lycopersicon esculentum | China  |
|          | KY967226         | HY        | CP/ complete sequence | Lycopersicon esculentum | China  |
|          | KY967227         | YT        | CP/ complete sequence | Lycopersicon esculentum | China  |

|          |                  |                       |                         |                  |
|----------|------------------|-----------------------|-------------------------|------------------|
| KY967228 | HHHT             | CP/complete sequence  | Lycopersicon esculentum | China            |
| MF002479 | HHHT4            | CP/ complete sequence | Lycopersicon esculentum | China            |
| MF002480 | HHHT3            | CP/ complete sequence | Lycopersicon esculentum | China            |
| MF002481 | HHHT2            | CP/ complete sequence | Lycopersicon esculentum | China            |
| MF002482 | HHHT1            | CP/ complete sequence | Lycopersicon esculentum | China            |
| MF002483 | SX1              | CP/ complete sequence | Lycopersicon esculentum | China            |
| MF002484 | GS100            | CP/complete sequence  | Lycopersicon esculentum | China            |
| MF002485 | GS1              | CP/ complete sequence | Lycopersicon esculentum | China            |
| MF002486 | SX_SG2           | CP/ complete sequence | Lycopersicon esculentum | China            |
| MF002487 | Tai,an1          | CP/ complete sequence | Lycopersicon esculentum | China            |
| MF002488 | Tai,an2          | CP/ complete sequence | Lycopersicon esculentum | China            |
| MF002489 | LC1              | CP/ complete sequence | Lycopersicon esculentum | China            |
| MF002490 | JX               | CP/complete sequence  | Lycopersicon esculentum | China            |
| MF002491 | XT               | CP/ complete sequence | Lycopersicon esculentum | China            |
| AF155507 | K                | CP/ complete sequence | tomato                  | China            |
| AJ132845 | S-1              | CP/ complete sequence | tomato                  | China            |
| AJ417701 | TL               | CP/ complete sequence | camellia                | China            |
| FN985165 | XJT-1            | CP/complete sequence  | tomato                  | China            |
| GQ280794 | N5               | CP/ complete sequence | tomato                  | China            |
| KJ207374 | Penghu           | CP/ complete sequence | Pepino                  | China            |
| KY652976 | Beijing          | CP                    | tomato                  | China            |
| KY652979 | Shandong         | CP                    | tomato                  | China            |
| KY629780 | Shanxi           | CP                    | tomato                  | China: Shanxi    |
| KY629781 | Neimenggu        | CP                    | tomato                  | China: Neimenggu |
| KY629782 | Shouguang        | CP                    | tomato                  | China: Shouguang |
| KY629783 | Liaocheng        | CP                    | tomato                  | China: Liaocheng |
| KY629784 | Tai'an           | CP                    | tomato                  | China: Tai'an    |
| Z98201   | S1               | CP                    | -                       | China            |
| JQ085379 | Penghu           | CP                    | pepino                  | China: Taiwan    |
| AY313136 | H. rosa-sinensis | CP                    | H. rosa-sinensis        | China            |
| JX857634 | LZ2              | CP                    | Medicago sativa         | China            |
| AY383730 | Lisianthus       | CP                    | lisianthus              | China: Taiwan    |
| JX025562 | P1               | CP                    | Solanum muricatum       | China            |
| JX025563 | P2               | CP                    | Solanum muricatum       | China            |
| JX025564 | T1               | CP                    | Lycopersicon esculentum | China            |
| JX025565 | G1               | CP                    | Gomphrena globosa       | China            |
| JX025566 | G2               | CP                    | Gomphrena globosa       | China            |
| JQ966553 | HX-T2            | CP                    | Solanum lycopersicum    | China            |
| JQ966550 | HX-T5            | CP                    | Capsicum annuum         | China            |
| JQ966551 | HX-T4            | CP                    | Capsicum annuum         | China            |
| JQ966552 | HX-T3            | CP                    | Capsicum annuum         | China            |
| JQ954826 | HX-T1            | CP                    | tomato                  | China            |
| JX982095 | RS8              | CP                    | pepino                  | China            |
| JX982097 | RS1              | CP                    | pepino                  | China            |
| KY977427 | ToMV-X1-3        | CP                    | river water             | China            |
| AB083196 | L11A-Fukushima   | CP/ complete sequence | tomato                  | Japan            |
| AB355139 | L11Y             | CP/ complete sequence | tomato                  | Japan            |
| X02144   | OM               | CP/ complete sequence | tomato                  | Japan            |
| MH507165 | GW1              | CP/ complete sequence | Solanum lycopersicum    | South Korea      |
| MH507166 | GW2              | CP/complete sequence  | Solanum lycopersicum    | South Korea      |
| AF260730 | potato1          | CP                    | Solanum tuberosum       | Korea            |
| HM623426 | Ls-K             | CP                    | Lycopersicon esculentum | South Korea      |
| EU885417 | ToMV-tom         | CP                    | tomato                  | South Korea      |
| MG345100 | BK1              | CP                    | Solanum lycopersicum    | South Korea      |
| AJ243571 | K1               | CP/ complete sequence | tobacco                 | Kazakhstan       |
| Z92909   | K2               | CP/ complete sequence | tobacco                 | Kazakhstan       |
| KX424990 | SN SLM 1         | CP                    | Solanum nigrum          | India            |
| JX121576 | Ham-Tom-6        | CP                    | tomato                  | Iran             |
| JX121574 | Ker.Pep.3        | CP                    | pepper                  | Iran             |

|               |          |              |                       |                      |                |
|---------------|----------|--------------|-----------------------|----------------------|----------------|
|               | JX112024 | Ham.Tom.9    | CP                    | tomato               | Iran           |
|               | JX121575 | Ker.Tom.41   | CP                    | tomato               | Iran           |
|               | JX121573 | Ker.Pep.38   | CP                    | pepper               | Iran           |
|               | JX121572 | Ker.Pep.18   | CP                    | pepper               | Iran           |
|               | JX112025 | Ham.Tom.19   | CP                    | tomato               | Iran           |
|               | JX121570 | Ker.Pha.2    | CP                    | kidney bean          | Iran           |
|               | JX121571 | Ker.Dat.24   | CP                    | thorn apple          | Iran           |
|               | JX135609 | Jir.Che.4    | CP                    | common lambsquarters | Iran           |
|               | KC914397 | Sm-T107      | CP                    | Solanum lycopersicum | Iran           |
|               | KC914398 | Sm-E59       | CP                    | Solanum melongena    | Iran           |
|               | KC914399 | Kh-P100      | CP                    | Solanum tuberosum    | Iran           |
|               | KC914400 | Kh-C239      | CP                    | Cucumis sativus      | Iran           |
|               | HQ593624 | G6           | CP                    | eggplant             | Iran           |
|               | HQ593625 | Q15          | CP                    | tomato               | Iran           |
|               | HQ593626 | T16          | CP                    | tomato               | Iran           |
|               | HQ593627 | G26          | CP                    | tomato               | Iran           |
|               | HQ593616 | TMV-Jahrum   | CP                    | Chenopodium murale   | Iran           |
| Europe<br>(B) | AY063743 | S15          | CP                    | tomato               | Spain          |
|               | JF810425 | S1           | CP                    | tomato               | Spain          |
|               | JF810426 | S2           | CP                    | tomato               | Spain          |
|               | JF810427 | S5           | CP                    | tomato               | Spain          |
|               | JF810428 | S17          | CP                    | tomato               | Spain          |
|               | JF810429 | S18          | CP                    | tomato               | Spain          |
|               | JF810430 | S19          | CP                    | tomato               | Spain          |
|               | JF810431 | S20          | CP                    | tomato               | Spain          |
|               | JF810432 | S21          | CP                    | tomato               | Spain          |
|               | JF810433 | S22          | CP                    | tomato               | Spain          |
|               | JF810434 | S9           | CP                    | tomato               | Spain          |
|               | JF810435 | S10          | CP                    | tomato               | Spain          |
|               | JF810436 | S16          | CP                    | tomato               | Spain          |
|               | JF810437 | S14          | CP                    | tomato               | Spain          |
|               | JF810438 | S15          | CP                    | tomato               | Spain          |
|               | JF810439 | S25          | CP                    | tomato               | Spain          |
|               | JN381939 | T11          | CP                    | tomato               | Spain          |
|               | JN381943 | T15          | CP                    | tomato               | Spain          |
|               | JN381944 | T16          | CP                    | tomato               | Spain          |
|               | JN381938 | T10          | CP                    | tomato               | Spain          |
|               | JN381940 | T12          | CP                    | tomato               | Spain          |
|               | JN381941 | T13          | CP                    | tomato               | Spain          |
|               | JN381942 | T14          | CP                    | tomato               | Spain          |
|               | JN381931 | T1           | CP                    | tomato               | Spain          |
|               | JN381932 | T2           | CP                    | tomato               | Spain          |
|               | JN381933 | T3           | CP                    | tomato               | Spain          |
|               | JN381934 | T4           | CP                    | tomato               | Spain          |
|               | JN381935 | T5           | CP                    | pepper               | Spain          |
|               | JN381936 | T8           | CP                    | pepper               | Spain          |
|               | JN381937 | T9           | CP                    | tomato               | Spain          |
|               | KY810788 | FERA_160205  | CP/ complete sequence | Solanum lycopersicum | United Kingdom |
|               | DQ873692 | ToMV1-2      | CP/complete sequence  | tomato               | Germany        |
|               | AJ429084 | DSMZ PV-0135 | CP                    | Capsicum annum L.    | Germany        |
|               | AJ429085 | DSMZ PV-127  | CP                    | Capsicum annum L.    | Germany        |
|               | AJ429086 | DSMZ PV-472  | CP                    | Capsicum annum L.    | Germany        |
|               | AJ429083 | 437          | CP                    | Capsicum annum L.    | Germany        |
|               | MG018614 | 105-12       | CP                    | tomato               | Serbia         |
|               | KP861861 | ukr3         | CP                    | tomato               | Ukraine        |
|               | KY912162 | SL-1         | CP/ complete sequence | tomato               | Slovakia       |
| Africa<br>(C) | LN827930 | AH1          | CP                    | tomato               | Egypt          |
|               | LN827931 | AH2          | CP                    | tomato               | Egypt          |

|                |           |            |                       |                         |           |
|----------------|-----------|------------|-----------------------|-------------------------|-----------|
|                | LN827932  | AH3        | CP                    | tomato                  | Egypt     |
|                | LN827933  | AH4        | CP                    | tomato                  | Egypt     |
|                | LN827934  | AH5        | CP                    | tomato                  | Egypt     |
|                | LN827935  | AH6        | CP                    | tomato                  | Egypt     |
|                | LN827936  | AH7        | CP                    | tomato                  | Egypt     |
|                | LN827937  | AH8        | CP                    | tomato                  | Egypt     |
|                | LN827938  | AH9        | CP                    | tomato                  | Egypt     |
|                | LN827939  | AH10       | CP                    | -                       | Egypt     |
|                | KU321698  | AH4        | CP/ complete sequence | tomato                  | Egypt     |
|                | KX711903  | mutoko     | CP/ complete sequence | Solanum lycopersicum    | Zimbabwe  |
|                | MG456601  | ToMV-Ug    | CP/ complete sequence | Solanum lycopersicum    | Uganda    |
| America<br>(D) | MH006893  | Qua+1      | CP                    | Solanum lycopersicum    | Brazil    |
|                | AF411922  | ToMV-SP    | CP                    | tomato                  | Brazil    |
|                | KT923127  | -          | CP                    | Nicotiana tabacum       | Brazil    |
|                | KR537870  | 99-1       | CP/ complete sequence | Jasminum multiflorum    | USA       |
| Oceania        | AF332868  | Queensland | CP/ complete sequence | Lycopersicon esculentum | Australia |
| -              | NC_001367 |            |                       | Tobacco mosaic virus    |           |

**Table S2.** Identities of full genome sequences between GS100 isolate and others in GenBank /%.

| Isolate | GenBank No. | Origin            | Host                    | Genome | 5'UTR | 184 KDa | 126 KDa | MP   | CP   | 3'UTR |
|---------|-------------|-------------------|-------------------------|--------|-------|---------|---------|------|------|-------|
| GS1     | MF002485    | China (Shouguang) | Lycopersicon esculentum | 99.6   | 100   | 99.6    | 99.3    | 99.4 | 99.4 | 100   |
| SGZZ    | KY967221    | China (Shouguang) | Lycopersicon esculentum | 98.9   | 100   | 98.9    | 99.4    | 99.0 | 98.8 | 98.0  |
| SGHG    | KY967220    | China (Shouguang) | Lycopersicon esculentum | 99.6   | 100   | 99.7    | 99.2    | 99.5 | 99.2 | 99.5  |
| Taian   | KY967222    | China (Taian)     | Lycopersicon esculentum | 99.6   | 100   | 99.7    | 99.5    | 99.4 | 99.8 | 99.5  |
| Taian1  | MF002487    | China (Taian)     | Lycopersicon esculentum | 99.6   | 100   | 99.9    | 99.8    | 99.5 | 99.5 | 99.5  |
| Taian2  | MF002488    | China (Taian)     | Lycopersicon esculentum | 99.2   | 98.6  | 99.0    | 99.0    | 99.5 | 99.2 | 99.4  |
| XT      | MF002491    | China (Taian)     | Lycopersicon esculentum | 99.6   | 100   | 99.7    | 99.5    | 99.4 | 99.8 | 99.5  |
| LC1     | MF002489    | China (Liaocheng) | Lycopersicon esculentum | 99.6   | 100   | 99.7    | 99.3    | 99.5 | 99.2 | 98.5  |
| JX      | MF002490    | China (Jinxiang)  | Lycopersicon esculentum | 98.9   | 100   | 98.9    | 99.4    | 99.1 | 98.8 | 98.0  |
| ZB      | KY967223    | China (Zibo)      | Lycopersicon esculentum | 98.8   | 100   | 98.9    | 99.3    | 99.0 | 98.8 | 99.0  |
| JN      | KY967224    | China (Jinan)     | Lycopersicon esculentum | 98.9   | 100   | 98.8    | 99.2    | 99.0 | 98.8 | 99.0  |
| LY      | KY967225    | China (Laiyang)   | Lycopersicon esculentum | 98.9   | 100   | 98.8    | 99.1    | 99.0 | 98.8 | 99.0  |
| HY      | KY967226    | China (Haiyang)   | Lycopersicon esculentum | 98.9   | 100   | 98.8    | 99.0    | 99.0 | 98.9 | 98.0  |
| YT      | KY967227    | China (Yantai)    | Lycopersicon esculentum | 98.9   | 97.3  | 98.9    | 99.2    | 99.1 | 98.8 | 98.0  |
| SX      | KY967219    | China (Shanxi)    | Lycopersicon esculentum | 98.5   | 98.6  | 98.7    | 98.7    | 99.0 | 98.1 | 98.0  |
| SX1     | MF002483    | China (Jinzhong)  | Lycopersicon esculentum | 98.6   | 98.6  | 98.8    | 99.2    | 98.9 | 98.3 | 98.0  |
| HHHT    | KY967228    | China (Neimenggu) | Lycopersicon esculentum | 98.7   | 98.6  | 98.8    | 99.1    | 99.0 | 98.1 | 97.0  |
| HHHT1   | MF002482    | China (Huhehaote) | Lycopersicon esculentum | 98.6   | 98.6  | 98.7    | 98.9    | 98.2 | 98.1 | 98.5  |
| HHHT2   | MF002481    | China (Huhehaote) | Lycopersicon esculentum | 98.7   | 98.6  | 98.8    | 99.2    | 98.6 | 98.1 | 98.5  |

|                |          |                   |                         |      |      |      |      |      |      |      |
|----------------|----------|-------------------|-------------------------|------|------|------|------|------|------|------|
| HHHT3          | MF002480 | China (Huhehaote) | Lycopersicon esculentum | 98.7 | 98.6 | 98.7 | 98.7 | 98.9 | 98.3 | 98.5 |
| HHHT4          | MF002479 | China (Huhehaote) | Lycopersicon esculentum | 98.7 | 98.6 | 98.8 | 98.9 | 98.9 | 98.3 | 98.0 |
| L11A-Fukushima | AB083196 | Japan             | tomato                  | 99.1 | 97.3 | 96.9 | 99.0 | 99.1 | 98.8 | 98.5 |
| L11Y           | AB355139 | Japan             | Tobacco                 | 96.3 | 97.3 | 97.0 | 99.1 | 99.1 | 98.3 | 98.5 |
| K              | AF155507 | China             | tomato                  | 98.9 | 97.3 | 96.7 | 98.7 | 98.6 | 98.8 | 98.5 |
| Queensland     | AF332868 | Australia         | tomato                  | 99.2 | 97.3 | 98.0 | 99.0 | 99.1 | 99.0 | 98.0 |
| ToMV1-2        | DQ873692 | Germany           | tomato                  | 99.3 | 97.3 | 97.2 | 99.3 | 99.1 | 99.2 | 98.5 |
| N5             | GQ280794 | China             | Lycopersicon esculentum | 98.0 | 97.3 | 96.8 | 98.8 | 99.0 | 98.1 | 97.0 |
| Penghu         | KJ207374 | Taiwan            | Solanum muricatum       | 98.8 | 97.3 | 96.8 | 99.0 | 99.1 | 98.1 | 96.1 |
| AH4            | KU321698 | Egypt             | tomato                  | 93.8 | 97.3 | 96.5 | 96.6 | 98.6 | 98.3 | 96.6 |
| OM             | X02144   | OM                | tomato                  | 99.2 | 97.3 | 97.1 | 99.1 | 99.1 | 98.8 | 98.5 |
| K2             | Z92909   | Kazakhstan        | tomato                  | 90.1 | 97.3 | 96.9 | 99.0 | 99.2 | 97.7 | 97.5 |
| 99-1           | KR537870 | USA               | Jasminum multiflorum    | 98.6 | 100  | 99.0 | 99.0 | 99.3 | 99.0 | 93.2 |
| TL             | AJ417701 | China             | camellia                | 73.2 | 100  | 99.1 | 99.0 | 99.2 | 99.2 | 99.6 |
| FERA_160205    | KY810788 | United Kingdom    | Solanum lycopersicum    | 98.9 | 92.1 | 99.2 | 99.2 | 97.5 | 99.0 | 98.1 |
| GS102          | KY949475 | China (Shouguang) | Lycopersicon esculentum | 76.9 | 100  | 90.6 | 93.5 | 100  | 100  | 100  |
| GW1            | MH507165 | South Korea       | Solanum lycopersicum    | 99.0 | 100  | 99.2 | 99.3 | 99.2 | 99.2 | 99.2 |
| GW2            | MH507166 | South Korea       | Solanum lycopersicum    | 99.0 | 100  | 99.2 | 99.3 | 99.2 | 99.2 | 99.2 |
| K1             | AJ243571 | Kazakhstan        | tobacco                 | 73.3 | 100  | 99.3 | 99.3 | 99.4 | 98.2 | 98.9 |
| LC             | KY949481 | China (Liaocheng) | Lycopersicon esculentum | 99.6 | 100  | 99.8 | 99.8 | 99.6 | 99.3 | 99.6 |
| mutoko         | KX711903 | Zimbabwe          | Solanum lycopersicum    | 98.7 | 100  | 99.1 | 99.2 | 98.9 | 98.9 | 94.3 |
| Neimenggu      | KY949480 | China (Neimenggu) | Lycopersicon esculentum | 98.8 | 98.0 | 99.1 | 99.2 | 99.2 | 98.5 | 98.5 |
| S-1            | AJ132845 | China             | tomato                  | 98.9 | 100  | 99.0 | 99.0 | 99.3 | 99.3 | 95.5 |
| SL-1           | KY912162 | Slovakia          | tomato                  | 98.8 | 100  | 99.2 | 99.2 | 98.9 | 97.9 | 99.2 |
| SX2            | MF002486 | China (Weifang)   | Lycopersicon esculentum | 99.6 | 100  | 99.8 | 99.8 | 99.6 | 99.3 | 99.6 |
| ToMV-Ug        | MG456601 | Uganda            | Solanum lycopersicum    | 98.8 | 100  | 99.0 | 99.1 | 99.3 | 99.0 | 98.5 |
| XJT-1          | FN985165 | China             | tomato                  | 98.9 | 100  | 99.1 | 99.1 | 99.0 | 99.2 | 98.9 |

**Table S4.** Analysis of coat protein gene of ToMV in four regions.

| Region | Region | Fst     |
|--------|--------|---------|
| A      | B      | 0.04543 |
| A      | C      | 0.13702 |
| A      | D      | 0.09459 |
| B      | C      | 0.38170 |
| B      | D      | 0.00734 |
| C      | D      | 0.07137 |

A (Asia), B (Europe), C (Africa) and D (America).

**Table S5.** Analysis of coat protein gene of ToMV in six provinces of China.

| Region | Region | Fst     |
|--------|--------|---------|
| a      | b      | 0.34000 |
| a      | c      | 0.50413 |
| a      | d      | 0.09002 |
| a      | e      | 0.12950 |
| a      | f      | 0.13067 |
| b      | c      | 0.18333 |

|   |   |         |
|---|---|---------|
| b | d | 0.05226 |
| b | e | 0.35294 |
| b | f | 0.20472 |
| c | d | 0.13004 |
| c | e | 0.51145 |
| c | f | 0.35632 |
| d | e | 0.05694 |
| d | f | 0.05290 |
| e | f | 0.07843 |

---

a (Shandong), b (Shanxi), c (Inner Mongolia), d (Beijing), e (Zhejiang), f (Gansu).
